# Supplementary material for: Trends in Alcohol Intake and the Association between Socio-Demographic Factors and Volume of Alcohol Intake amongst Adult Male Drinkers in China
Source: PubMed Central journal article supplement (PMC6406336; doi:10.3390/ijerph16040573), 2019-02-16
Supplement: ijerph-16-00573-s001.pdf [file ijerph-16-00573-s001.pdf]

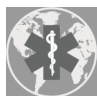

Supplementary Material

# Trends in Alcohol Intake and the Association between Socio-Demographic Factors and Volume of Alcohol Intake amongst Adult Male Drinkers in China

Ruiyi Liu <sup>1,2,3,†</sup>, Li Chen <sup>1,2,3,†</sup>, Fan Zhang <sup>1,2,3</sup>, Rui Zhu <sup>1,2,3</sup>, Xinjie Lin <sup>4</sup>, Xuchen Meng <sup>4</sup>, Huabing Li <sup>1,2,3</sup>, Xun Lei <sup>1,2,3,\*</sup> and Yong Zhao <sup>1,2,3,5\*</sup>

<sup>1</sup> School of Public Health and Management, Chongqing Medical University, Chongqing 400016, China; lry981118@foxmail.com (R.L.); nameclx@foxmail.com (L.C.); ava11@126.com (F.Z.); 2016111041@stu.cqmu.edu.cn (R.Z.); lhbcqmu@outlook.com (H.L.)

<sup>2</sup> Research Center for Medicine and Social Development, Chongqing Medical University, Chongqing 400016, China

<sup>3</sup> The Innovation Center for Social Risk Governance in Health, Chongqing Medical University, Chongqing 400016, China

<sup>4</sup> Clinical College, Chongqing Medical University, Chongqing 400016, China; linxinjie1@outlook.com (X.L.); angelitamxc@hotmail.com (X.M.)

<sup>5</sup> Chongqing Key Laboratory of Child Nutrition and Health. Chongqing 400016, China;

† These authors contributed equally to this work.

\* Correspondence: zhaoyong@cqmu.edu.cn (Y.Z.); leixun521@163.com (X.L.); Tel.: +86-23-6848-5008 (Y.Z.); +86-23-6848-5031 (X.L.)

**Table S1.** Trends in prevalence of different types of alcohol consumption among male drinkers by survey year.

| Variable            |                   |   | 2004 | 2006 | 2009 | 2011 | Pearson Chi-Square | p-Value |
|---------------------|-------------------|---|------|------|------|------|--------------------|---------|
| Beer consumption    | Non-beer-eater    | N | 1070 | 952  | 908  | 1121 | 79.81              | 0.000   |
|                     |                   | % | 44.6 | 40.1 | 35.1 | 34.1 |                    |         |
|                     | Beer-eater        | N | 1327 | 1423 | 1680 | 2167 |                    |         |
|                     |                   | % | 55.4 | 59.9 | 64.9 | 65.9 |                    |         |
| Wine consumption    | Non-wine-eater    | N | 2172 | 2220 | 2292 | 2695 | 198.18             | 0.000   |
|                     |                   | % | 90.6 | 93.5 | 88.6 | 82.0 |                    |         |
|                     | Wine-eater        | N | 225  | 155  | 296  | 593  |                    |         |
|                     |                   | % | 9.4  | 6.5  | 11.4 | 18.0 |                    |         |
| Liqueur consumption | Non-liqueur-eater | N | 413  | 501  | 594  | 809  | 47.30              | 0.000   |
|                     |                   | % | 17.2 | 21.1 | 23.0 | 24.6 |                    |         |
|                     | Liqueur-eater     | N | 1984 | 1874 | 1994 | 2479 |                    |         |
|                     |                   | % | 82.8 | 78.9 | 77.0 | 75.4 |                    |         |

**Table S2.** Time trends in the prevalence of alcohol consumption (beer, wine, liqueur) amongst male drinkers by age groups, CHNS.

| Age groups |             | Beer |      |      |      | Wine |      |      |      | Liqueur |      |      |      |      |
|------------|-------------|------|------|------|------|------|------|------|------|---------|------|------|------|------|
|            |             | 2004 | 2006 | 2009 | 2011 | 2004 | 2006 | 2009 | 2011 | 2004    | 2006 | 2009 | 2011 |      |
| 18-35      | Non drinker | N    | 111  | 69   | 43   | 42   | 485  | 435  | 404  | 428     | 166  | 178  | 202  | 223  |
|            |             | %    | 20.4 | 14.8 | 9.3  | 8.1  | 89.0 | 93.5 | 87.1 | 82.1    | 30.5 | 38.3 | 43.5 | 42.8 |
| 36-50      | drinker     | N    | 434  | 396  | 421  | 479  | 60   | 30   | 60   | 93      | 379  | 287  | 262  | 298  |
|            |             | %    | 79.6 | 85.2 | 90.7 | 91.9 | 11.0 | 6.5  | 12.9 | 17.9    | 69.5 | 61.7 | 56.5 | 57.2 |
| 51-65      | Non drinker | N    | 360  | 289  | 244  | 278  | 853  | 868  | 856  | 984     | 141  | 175  | 215  | 258  |
|            |             | %    | 38.8 | 31.6 | 25.4 | 23.5 | 91.8 | 95.0 | 89.3 | 83.2    | 15.2 | 19.1 | 22.4 | 21.8 |
| ≥66        | drinker     | N    | 569  | 625  | 715  | 905  | 76   | 46   | 103  | 199     | 788  | 739  | 744  | 925  |
|            |             | %    | 61.2 | 68.4 | 74.6 | 76.5 | 8.2  | 5.0  | 10.7 | 16.8    | 84.8 | 80.9 | 77.6 | 78.2 |
| 18-35      | Non drinker | N    | 422  | 425  | 419  | 560  | 622  | 704  | 777  | 980     | 83   | 119  | 130  | 252  |
|            |             | %    | 61.4 | 55.9 | 47.9 | 46.2 | 90.5 | 92.6 | 88.9 | 80.9    | 12.1 | 15.7 | 14.9 | 20.8 |
| 36-50      | drinker     | N    | 265  | 335  | 455  | 652  | 65   | 56   | 97   | 232     | 604  | 641  | 744  | 960  |
|            |             | %    | 38.6 | 44.1 | 52.1 | 53.8 | 9.5  | 7.4  | 11.1 | 19.1    | 87.9 | 84.3 | 85.1 | 79.2 |
| 51-65      | Non drinker | N    | 177  | 169  | 202  | 241  | 212  | 213  | 255  | 303     | 23   | 29   | 47   | 76   |
|            |             | %    | 75.0 | 71.6 | 69.4 | 64.8 | 89.8 | 90.3 | 87.6 | 81.5    | 9.7  | 12.3 | 16.2 | 20.4 |
| ≥66        | drinker     | N    | 59   | 67   | 89   | 131  | 24   | 23   | 36   | 69      | 213  | 207  | 244  | 296  |
|            |             | %    | 25.0 | 28.4 | 30.6 | 35.2 | 10.2 | 9.7  | 12.4 | 18.5    | 90.3 | 87.7 | 83.8 | 79.6 |

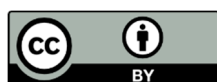

© 2019 by the authors. Submitted for possible open access publication under the terms and conditions of the Creative Commons Attribution (CC BY) license (<http://creativecommons.org/licenses/by/4.0/>).
